# Supplementary material for: Multidecadal Variability and Predictability of Antarctic Sea Ice in GFDL SPEAR_LO Model
Source: Copernicus journal article supplement (doi:10.5194/tc-2023-18), 2023-02-28
Supplement: Supplementary file [file tc-2023-18-AC1-supplement.pdf]

1  
2  
3  
4  
5  
6  
7  
8  
9  
10  
11  
12  
13  
14  
15  
16  
17  
18  
19  
20  
21  
22  
23  
24  
25

**Supplement**  
**for the reply to Reviewer 1's comments**

**Multidecadal Variability and Predictability**  
**of Antarctic Sea Ice in GFDL SPEAR\_LO Model**

Yushi Morioka<sup>1,2,3</sup>, Liping Zhang<sup>2,4</sup>, Thomas L. Delworth<sup>2</sup>,  
Xiaosong Yang<sup>2</sup>, Fanrong Zeng<sup>2</sup>, Masami Nonaka<sup>1</sup>, Swadhin K. Behera<sup>1</sup>

- 1: Application Laboratory, VAIg, JAMSTEC, Yokohama, Kanagawa, Japan
- 2: Geophysical Fluid Dynamics Laboratory, NOAA, Princeton, New Jersey, USA
- 3: Atmospheric and Oceanic Sciences Program, Princeton University,  
Princeton, New Jersey, USA
- 4: University Corporation for Atmospheric Research, Boulder, Colorado, USA

Apr 17, 2023  
Submitted to The Cryosphere

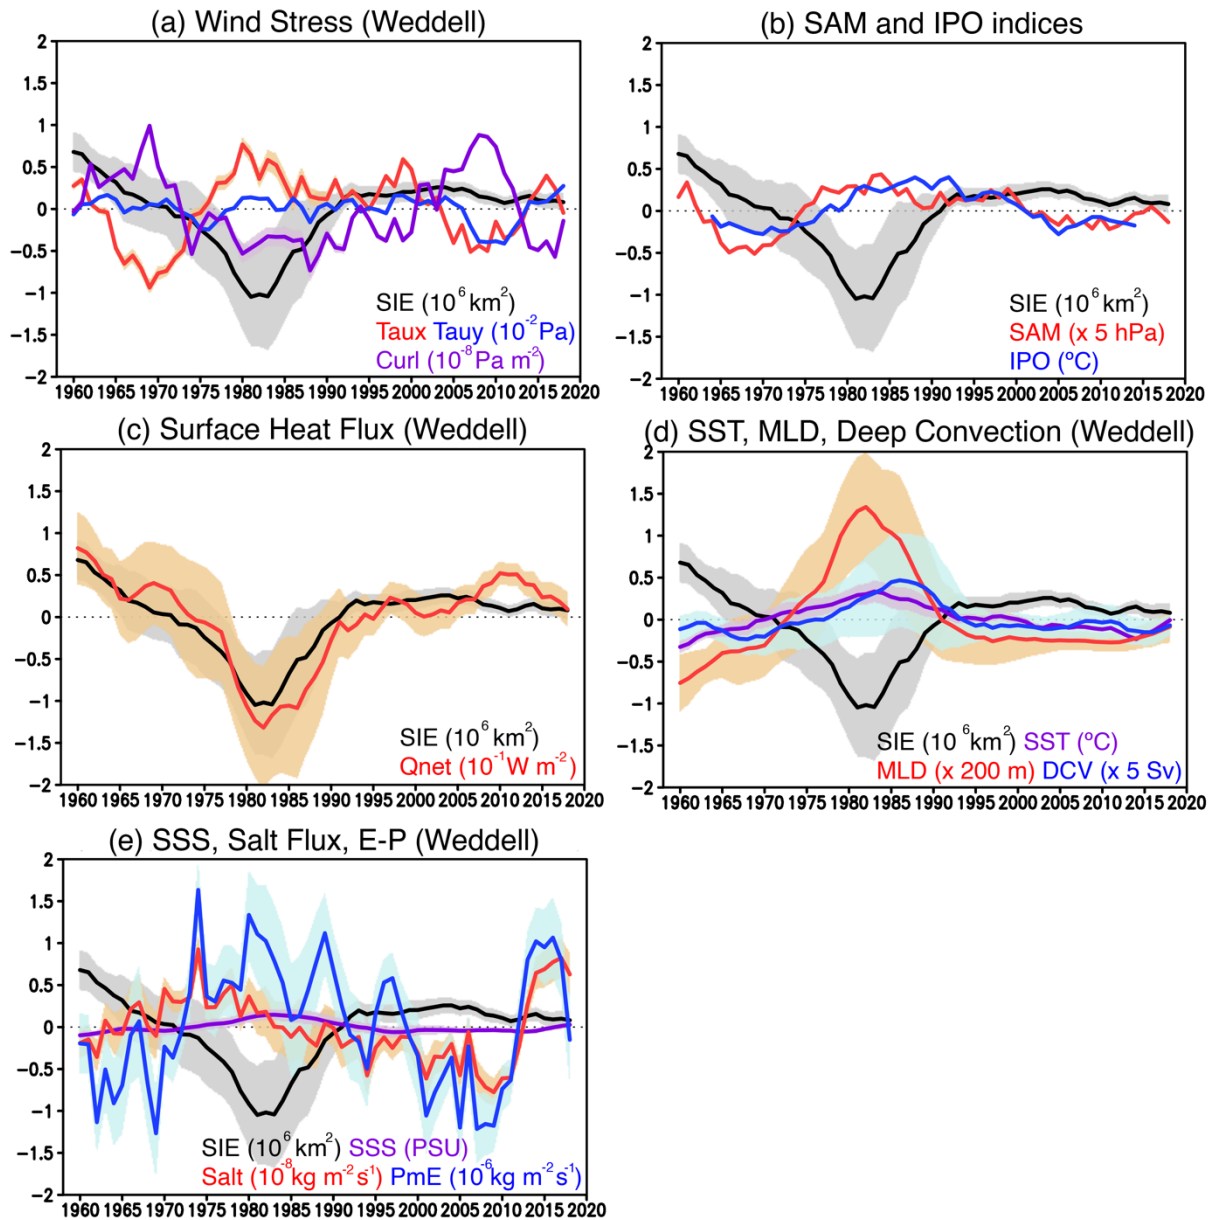

26

27 **Figure 3 (a)** Time series of 5-yr running mean SIE (black in  $10^6 \text{ km}^2$ ), zonal (Taux; red in  $10^{-2}$   
 28  $10^{-2} \text{ Pa}$ ) and meridional (Tauy; blue in  $10^{-2} \text{ Pa}$ ) wind stress, and wind stress curl (Curl; purple in  
 29  $10^{-8} \text{ Pa m}^2$ ) anomalies averaged in the Weddell Sea ( $60^\circ\text{W}-0^\circ$ , south of  $55^\circ\text{S}$ ) during 1958-  
 30 2020. Shades indicate one and minus one standard deviations of the anomalies from 30  
 31 ensemble members of the SPEAR\_LO\_DCIS. Positive wind stress curl anomalies correspond  
 32 to downwelling anomalies in the ocean. **(b)** Same as in **(a)**, but for the 5-yr running mean SAM  
 33 index (red in 5 hPa) and 13-yr running mean IPO index (blue in  $^\circ\text{C}$ ). **(c)** Same as in **(a)**, but for  
 34 the SIE (black in  $10^6 \text{ km}^2$ ) and the net surface heat flux (Qnet; red in  $10^{-1} \text{ W m}^{-2}$ ) anomalies.  
 35 Positive surface heat flux anomalies correspond to more heat going into the ocean. **(d)** Same  
 36 as in **(a)**, but for the SIE (black in  $10^6 \text{ km}^2$ ), sea surface temperature (SST; purple in  $^\circ\text{C}$ ), mixed-  
 37 layer depth (MLD; red in 200 m), and deep convection (DCV; blue in 5 Sv) anomalies. **(e)**

38 Same as in **(a)**, but for the SIE (black in  $10^6$  km<sup>2</sup>), sea surface salinity (SSS; purple in PSU),  
39 salt flux (Salt; red in  $10^{-8}$  kg m<sup>-2</sup> s<sup>-1</sup>), and precipitation minus evaporation (PmE; blue in  $10^{-6}$   
40 kg m<sup>-2</sup> s<sup>-1</sup>) anomalies. Positive salt flux anomalies correspond to anomalous salt going into the  
41 ocean at the surface associated with sea ice formation, whereas the positive PmE anomalies  
42 mean more freshwater going into the ocean.  
43

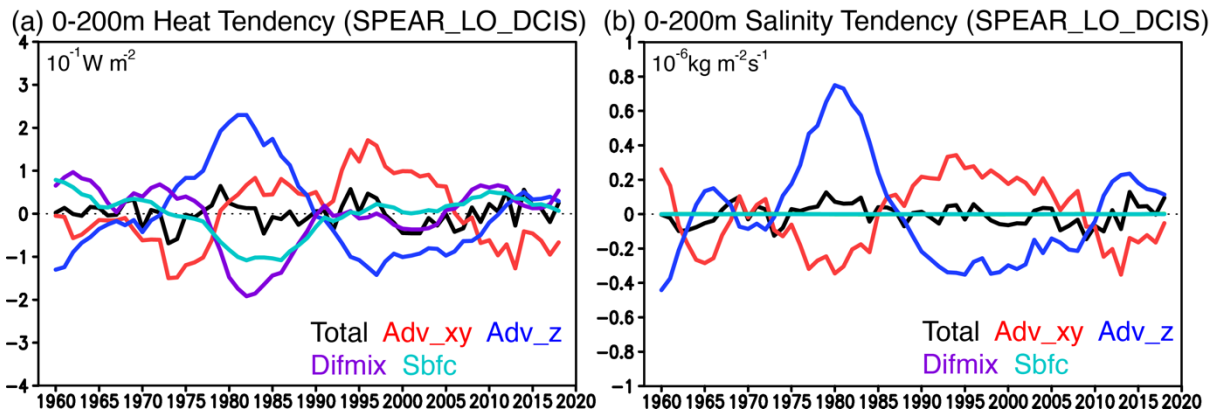

44

45 **Figure 6 (a)** Time series of 5-yr running mean ocean heat tendency (in  $10^{-1} \text{ W m}^{-2}$ ) anomalies  
 46 in the upper 200 m of the Weddell Sea from the SPEAR\_LO\_DCIS. Total ocean heat tendency  
 47 (Total; black), horizontal advection (Adv\_xy; red), vertical advection (Adv\_z; blue), mesoscale  
 48 diffusion and dianeutral mixing (Difmix; purple), and surface boundary forcing (Sbfc; light  
 49 blue) anomalies are shown, respectively. **(b)** Same as in **(a)**, but for the salinity tendency (in  
 50  $10^{-6} \text{ kg m}^{-2} \text{ s}^{-1}$ ) anomalies.

51

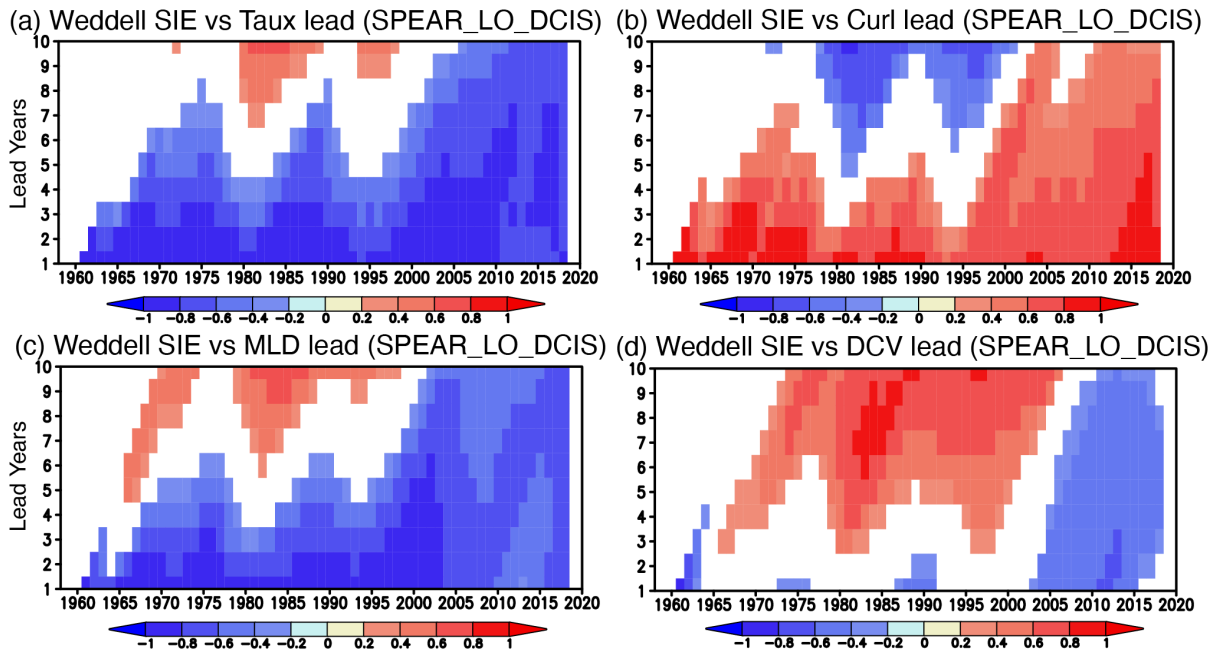

52

53 **Figure 7 (a)** Temporal evolution of inter-member correlation between the 5-yr running mean  
 54 SIE anomalies and the 5-yr running mean zonal wind stress (Taux) averaged in the Weddell  
 55 Sea from 30 ensemble members of the SPEAR\_LO\_DCIS as a function of lead years. Positive  
 56 lead years (Y-axis) mean that the Taux anomalies lead the SIE anomalies by the number of  
 57 years. Correlation coefficients that are statistically significant at 90 % using Student's *t*-test are  
 58 shown in color. **(b)** Same as in **(a)**, but for the inter-member correlation between the SIE  
 59 anomalies and the wind stress curl (Curl) anomalies. **(c)** Same as in **(a)**, but for the inter-  
 60 member correlation between the SIE anomalies and the mixed-layer depth (MLD) anomalies.  
 61 **(d)** Same as in **(a)**, but for the inter-member correlation between the SIE anomalies and the  
 62 deep convection (DCV) anomalies.

63

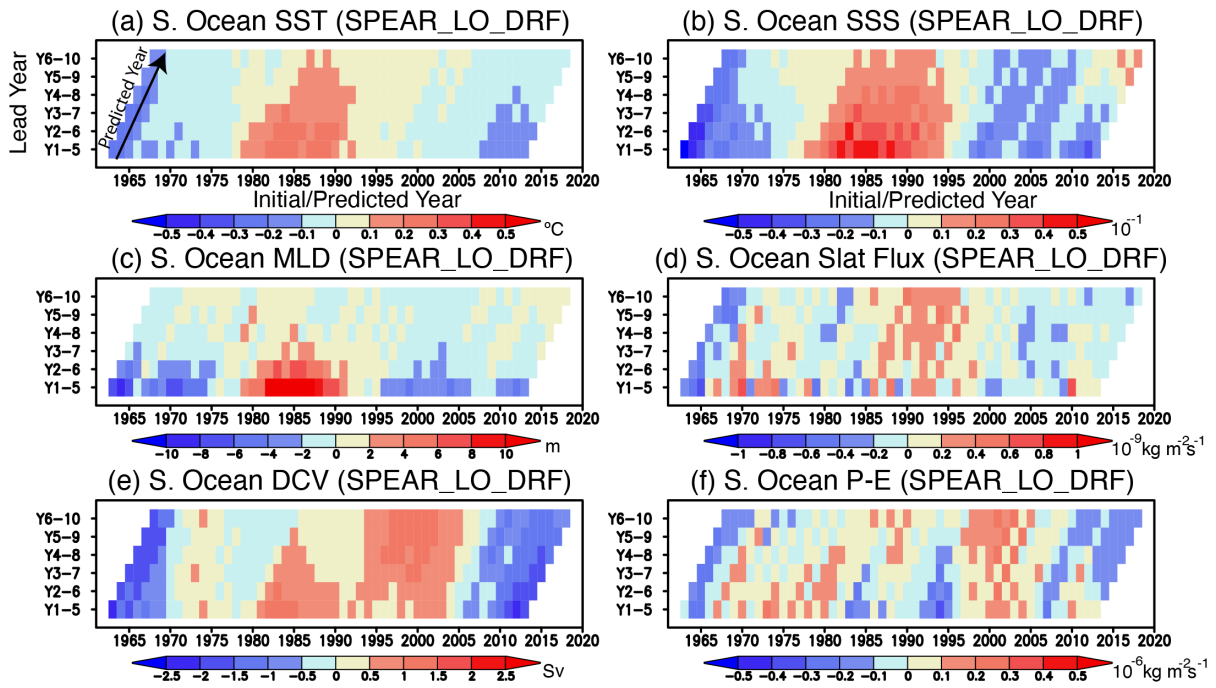

64

65 **Figure 11 (a)** Temporal evolution of ensemble mean Southern Ocean (south of 55°S) SST  
 66 anomalies predicted at lead times from 1-5 years to 6-10 years in the SPEAR\_LO\_DRF as a  
 67 function of initial/predicted years (x-axis) and lead years (y-axis). A black arrow indicates the  
 68 correlations with the same initial year for different lead times, while the corresponding x-axis  
 69 indicates the predicted years. **(b-f)** Same as in **(a)**, but for the SSS (in  $10^{-1}$  PSU), mixed-layer  
 70 depth (MLD; in m), salt flux (in  $10^{-9}$   $\text{kg m}^{-2} \text{s}^{-1}$ ), deep convection (DCV; in Sv), and  
 71 precipitation minus evaporation (P-E; in  $10^{-6}$   $\text{kg m}^{-2} \text{s}^{-1}$ ) anomalies averaged in the Southern  
 72 Ocean, respectively.

73

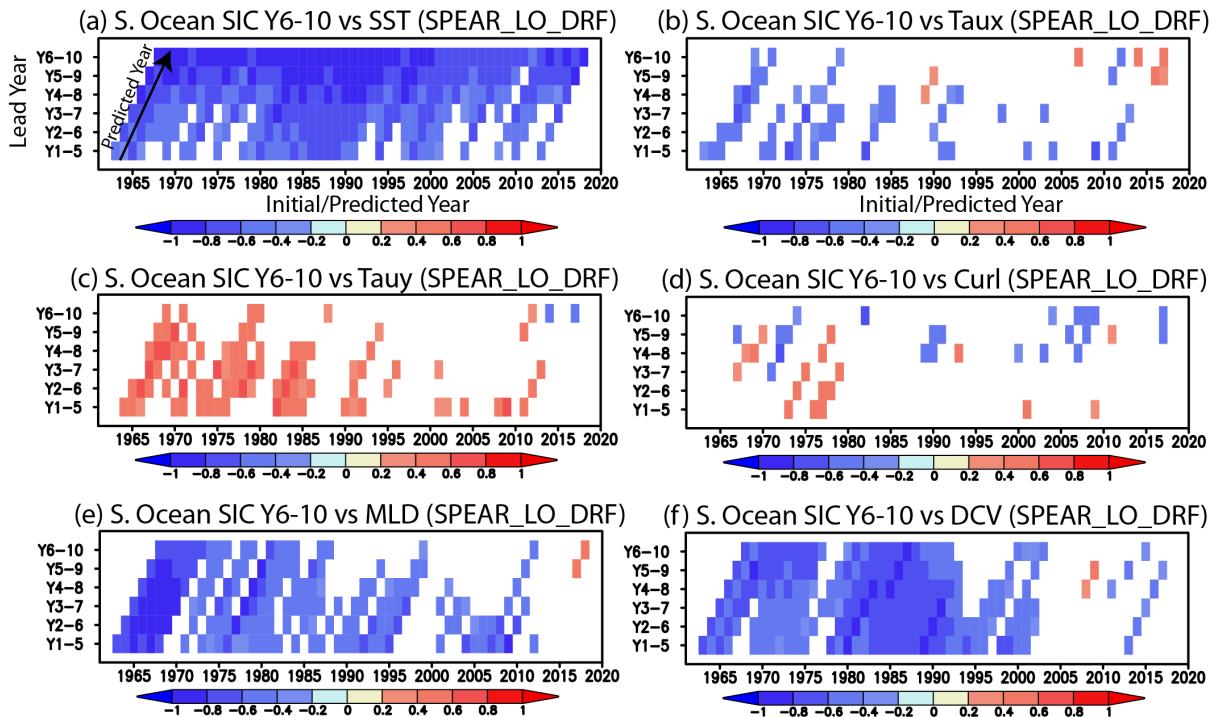

74

75 **Figure 12 (a)** Temporal evolution of inter-member correlation between the pan-Antarctic SIC  
 76 anomalies predicted at a lead time of 6-10 years and the Southern Ocean SST anomalies  
 77 predicted at lead times from 1-5 years to 6-10 years for the 20 ensemble members of the  
 78 SPEAR\_LO\_DRF as a function of initial/predicted years (x-axis) and lead years (y-axis). A  
 79 black arrow indicates the correlations with the same initial year for different lead times, while  
 80 the corresponding x-axis indicates the predicted years. Correlation coefficients that are  
 81 statistically significant at 90 % using Student's *t*-test are colored. **(b-f)** Same as in **(a)**, but for  
 82 the inter-member correlation with the zonal wind stress, meridional wind stress, wind stress  
 83 curl, mixed-layer depth, and deep convection anomalies averaged in the Southern Ocean.

84

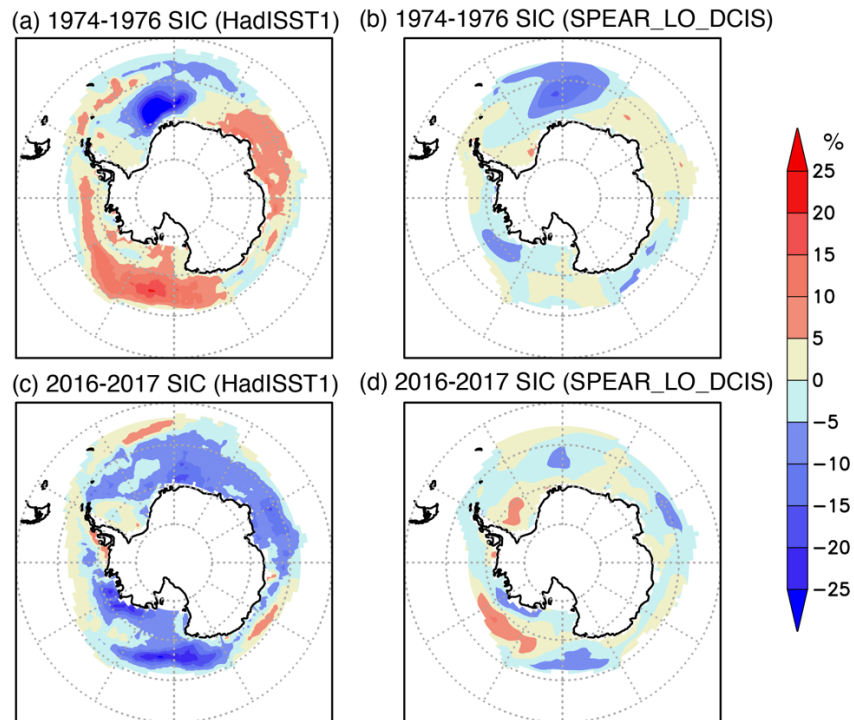

85

86 **Figure S4 (a)** Sea ice concentration (SIC, in %) anomaly averaged over 1974-1976 from the  
 87 HadISST1. **(b)** Same as in **(a)**, but for the SIC from the SPEAR\_LO\_DCIS. **(c, d)** Same as in  
 88 **(a, b)**, but for the SIC anomalies averaged over 2016-2017.

89
