# Supplementary material for: Multidecadal Variability and Predictability of Antarctic Sea Ice in GFDL SPEAR_LO Model
Source: Copernicus journal article supplement (doi:10.5194/tc-2023-18), 2023-02-28
Supplement: Supplementary file [file tc-2023-18-AC2-supplement.pdf]

1  
2  
3  
4  
5  
6  
7  
8  
9  
10  
11  
12  
13  
14  
15  
16  
17  
18  
19  
20  
21  
22  
23  
24  
25

**Supplement**  
**for the reply to Reviewer 2's comments**

**Multidecadal Variability and Predictability**  
**of Antarctic Sea Ice in GFDL SPEAR\_LO Model**

Yushi Morioka<sup>1,2,3</sup>, Liping Zhang<sup>2,4</sup>, Thomas L. Delworth<sup>2</sup>,  
Xiaosong Yang<sup>2</sup>, Fanrong Zeng<sup>2</sup>, Masami Nonaka<sup>1</sup>, Swadhin K. Behera<sup>1</sup>

- 1: Application Laboratory, VAIg, JAMSTEC, Yokohama, Kanagawa, Japan
- 2: Geophysical Fluid Dynamics Laboratory, NOAA, Princeton, New Jersey, USA
- 3: Atmospheric and Oceanic Sciences Program, Princeton University,  
Princeton, New Jersey, USA
- 4: University Corporation for Atmospheric Research, Boulder, Colorado, USA

Apr 17, 2023  
Submitted to The Cryosphere

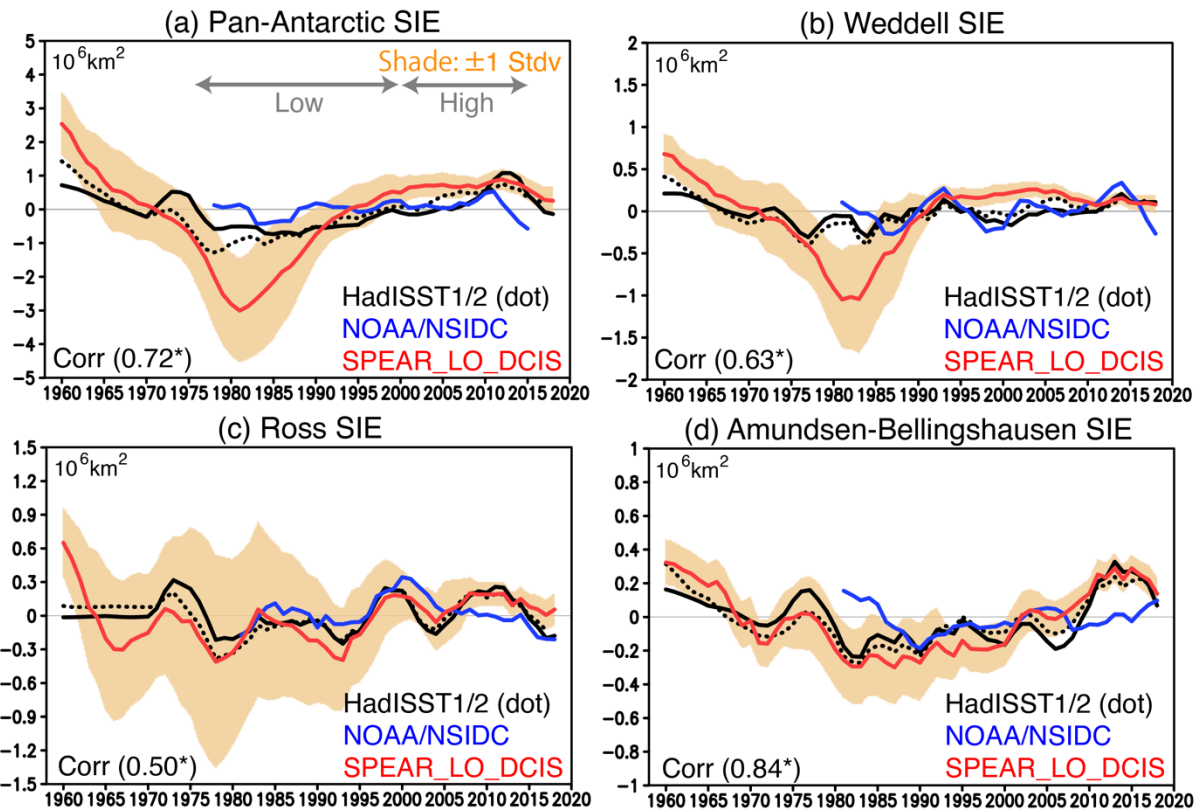

26

27 **Figure 2 (a)** Time series of 5-yr running mean sea ice extent (SIE in  $10^6 \text{ km}^2$ ) anomalies in the  
 28 pan-Antarctic region during 1958-2020. Observations from HadISST1 (black solid),  
 29 HadISST2 (black dotted) and the NOAA/NSIDC (blue) are shown, whereas the  
 30 SPEAR\_LO\_DCIS is shown with a red line. Orange shades indicate one and minus one  
 31 standard deviations of the SIE anomalies simulated from 30 ensemble members of  
 32 SPEAR\_LO\_DCIS. Gray arrows correspond to a low sea ice period (late 1970s-1990s) and a  
 33 high sea ice period (2000s-early 2010s). Correlation coefficient between HadISST1 and the  
 34 SPEAR\_LO\_DCIS is shown in the bottom left where the asterisk indicates the statistically  
 35 significant correlation at 90 % confidence level using Student's  $t$ -test. **(b-d)** Same as in **(a)**, but  
 36 for the SIE anomalies in the Weddell Sea ( $60^\circ\text{-}0^\circ\text{W}$ ), Ross Sea ( $180^\circ\text{-}120^\circ\text{W}$ ), and Amundsen-  
 37 Bellingshausen Sea ( $120^\circ\text{-}60^\circ\text{W}$ ), respectively.

38

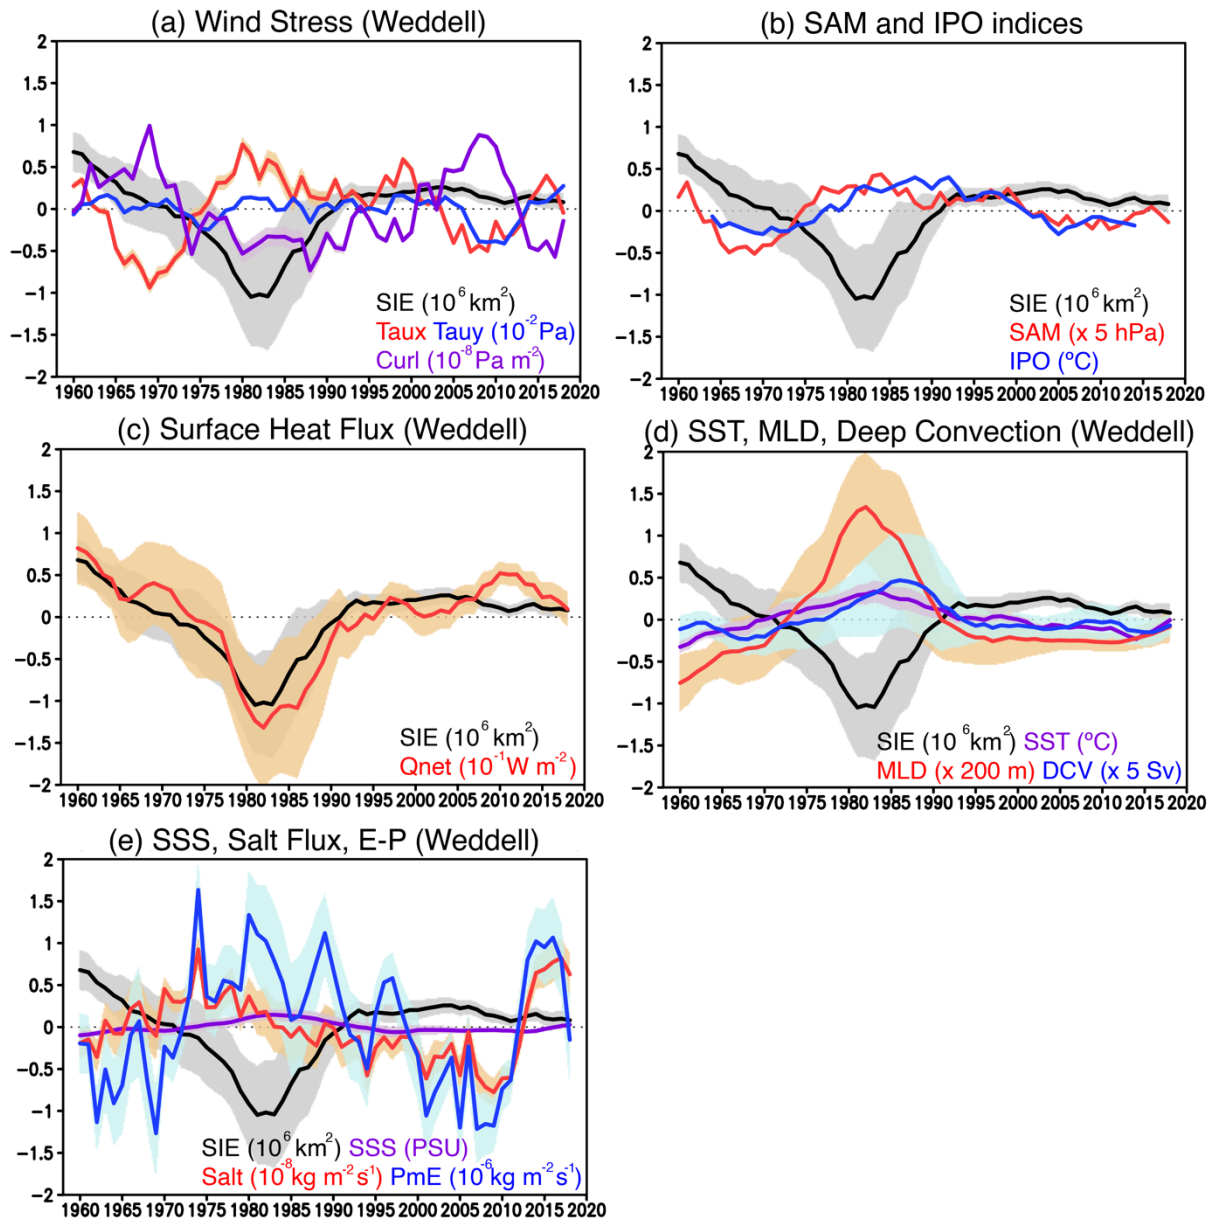

39

40 **Figure 3 (a)** Time series of 5-yr running mean SIE (black in  $10^6 \text{ km}^2$ ), zonal (Taux; red in  $10^{-2}$   
 41  $^\circ\text{Pa}$ ) and meridional (Tauy; blue in  $10^{-2} \text{ Pa}$ ) wind stress, and wind stress curl (Curl; purple in  
 42  $10^{-8} \text{ Pa m}^2$ ) anomalies averaged in the Weddell Sea ( $60^\circ\text{W}$ - $0^\circ$ , south of  $55^\circ\text{S}$ ) during 1958-  
 43 2020. Shades indicate one and minus one standard deviations of the anomalies from 30  
 44 ensemble members of the SPEAR\_LO\_DCIS. Positive wind stress curl anomalies correspond  
 45 to downwelling anomalies in the ocean. **(b)** Same as in **(a)**, but for the 5-yr running mean SAM  
 46 index (red in 5 hPa) and 13-yr running mean IPO index (blue in  $^\circ\text{C}$ ). **(c)** Same as in **(a)**, but for  
 47 the SIE (black in  $10^6 \text{ km}^2$ ) and the net surface heat flux (Qnet; red in  $10^{-1} \text{ W m}^2$ ) anomalies.  
 48 Positive surface heat flux anomalies correspond to more heat going into the ocean. **(d)** Same  
 49 as in **(a)**, but for the SIE (black in  $10^6 \text{ km}^2$ ), sea surface temperature (SST; purple in  $^\circ\text{C}$ ), mixed-  
 50 layer depth (MLD; red in 200 m), and deep convection (DCV; blue in 5 Sv) anomalies. **(e)**

51 Same as in **(a)**, but for the SIE (black in  $10^6 \text{ km}^2$ ), sea surface salinity (SSS; purple in PSU),  
52 salt flux (Salt; red in  $10^{-8} \text{ kg m}^{-2} \text{ s}^{-1}$ ), and precipitation minus evaporation (PmE; blue in  $10^{-6}$   
53  $\text{kg m}^{-2} \text{ s}^{-1}$ ) anomalies. Positive salt flux anomalies correspond to anomalous salt going into the  
54 ocean at the surface associated with sea ice formation, whereas the positive PmE anomalies  
55 mean more freshwater going into the ocean.

56

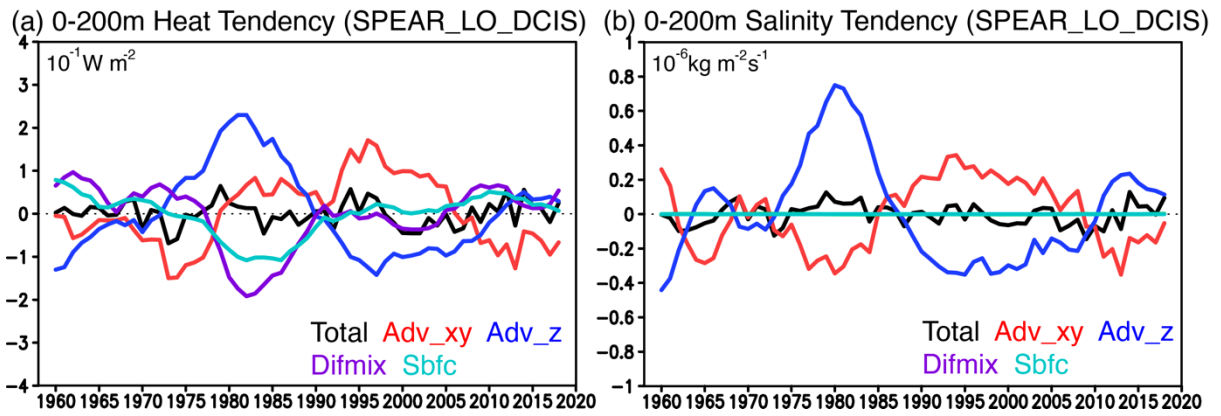

57

58

59

60

61

62

63

64

**Figure 6 (a)** Time series of 5-yr running mean ocean heat tendency (in  $10^{-1} \text{ W m}^{-2}$ ) anomalies in the upper 200 m of the Weddell Sea from the SPEAR\_LO\_DCIS. Total ocean heat tendency (Total; black), horizontal advection (Adv\_xy; red), vertical advection (Adv\_z; blue), mesoscale diffusion and dianeutral mixing (Difmix; purple), and surface boundary forcing (Sbfc; light blue) anomalies are shown, respectively. **(b)** Same as in **(a)**, but for the salinity tendency (in  $10^{-6} \text{ kg m}^{-2} \text{ s}^{-1}$ ) anomalies.

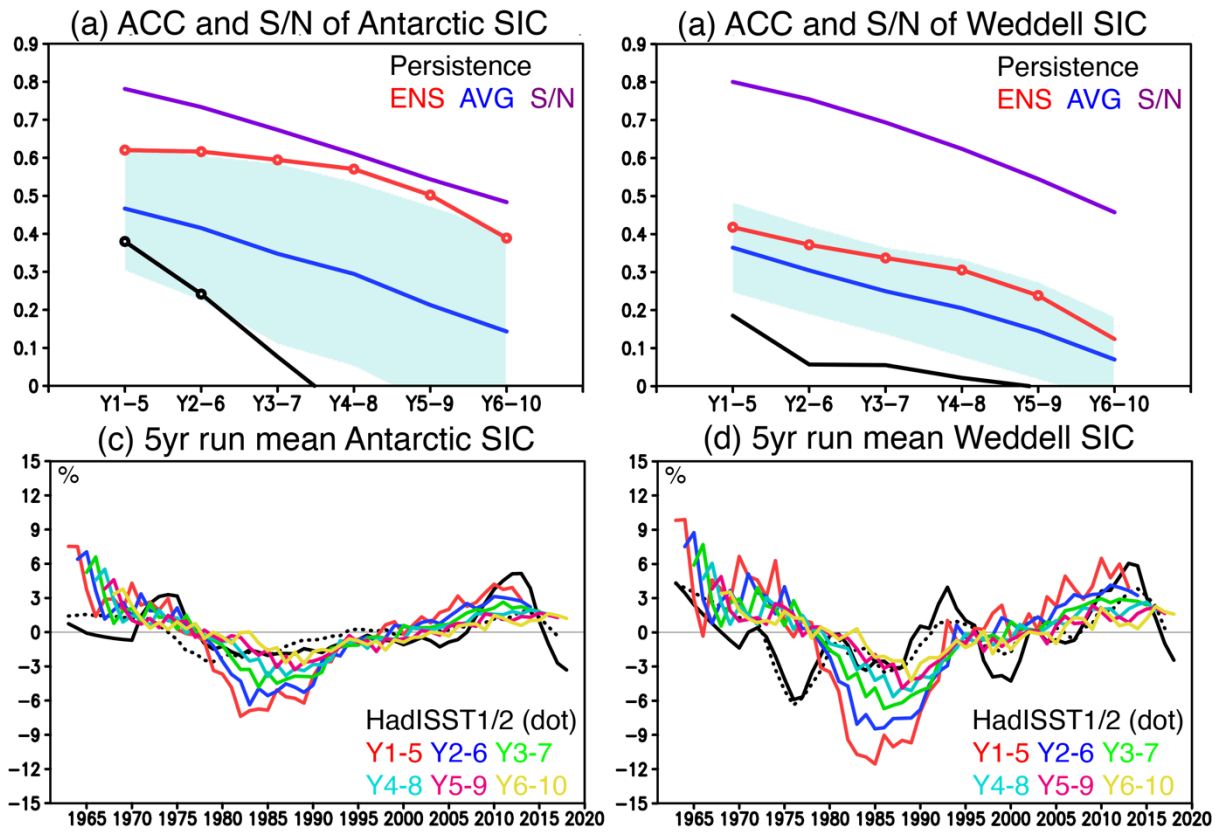

65

66 **Figure 9 (a)** ACC and signal-to-noise (S/N) ratio of pan-Antarctic (area-weighted mean) SIC  
 67 anomalies predicted at lead times from 1-5 years to 6-10 years. The ACCs from the persistence  
 68 prediction (black) and the SPEAR\_LO\_DRF ensemble mean (red), which are statistically  
 69 significant at 90 % using Student's *t*-test, are described with open circles. The average of  
 70 individual members' ACCs from the SPEAR\_LO\_DRF (blue) is shown with its one standard  
 71 deviation (light blue shade). The S/N ratio from the SPEAR\_LO\_DRF (purple) is also plotted.  
 72 **(b)** Same as in **(a)**, but for the ACC and S/N ratio of the SIC anomalies averaged in the Weddell  
 73 Sea. **(c)** Time series of 5-yr running mean pan-Antarctic SIC (in %) anomalies during 1961-  
 74 2020. Black lines show the observed SIC anomalies from HadISST1 (solid line) and HadISST2  
 75 (dotted line), whereas other colored lines correspond to the ensemble mean SIC anomalies  
 76 predicted at lead times from 1-5 years to 6-10 years in the SPEAR\_LO\_DRF. **(d)** Same as in  
 77 **(c)**, but for the SIC anomalies averaged in the Weddell Sea.

78

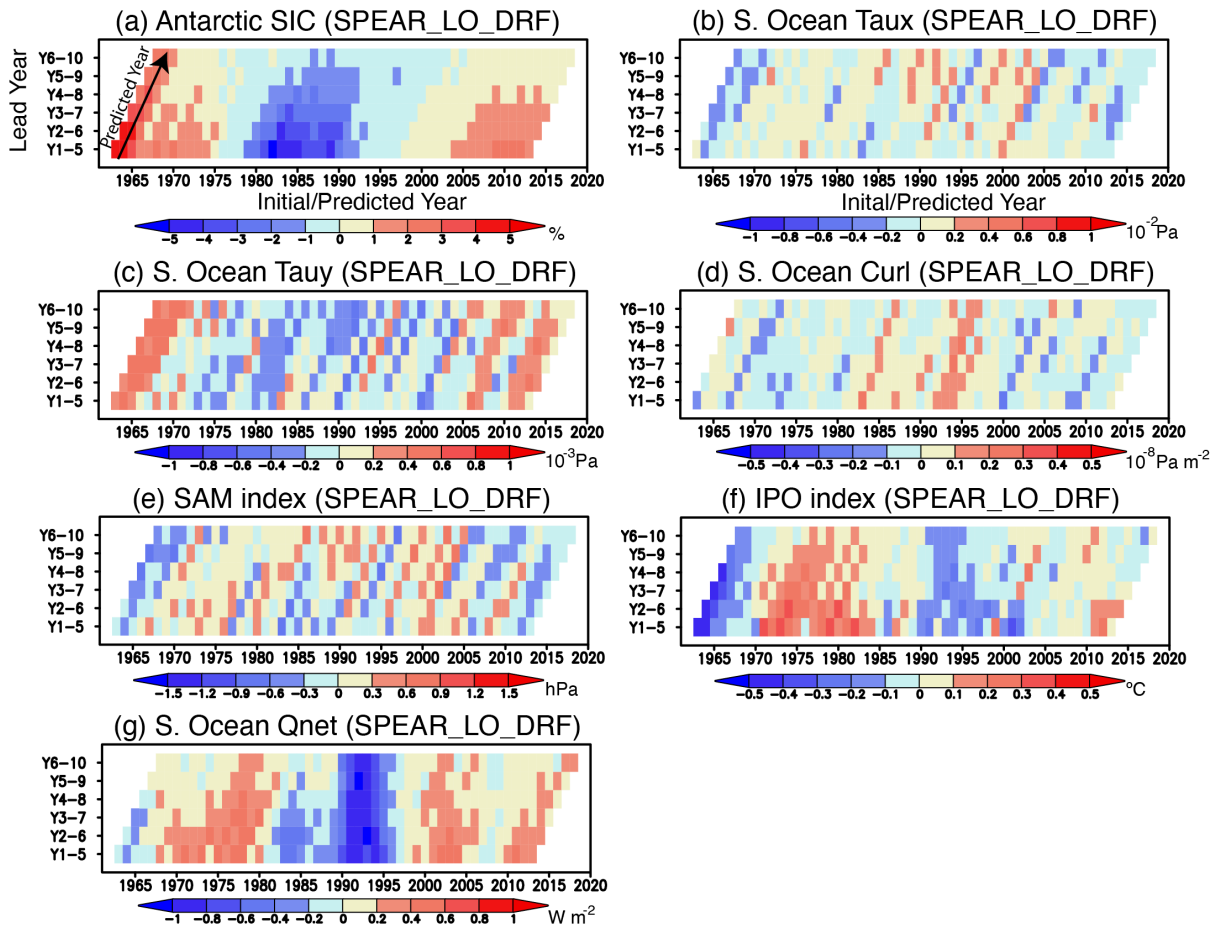

79

80 **Figure 10** (a) Temporal evolution of ensemble mean pan-Antarctic SIC anomalies predicted  
 81 at lead times from 1-5 years to 6-10 years in the SPEAR\_LO\_DRF as a function of  
 82 initial/predicted years (x-axis) and lead years (y-axis). A black arrow indicates the correlations  
 83 with the same initial year for different lead times, while the corresponding x-axis indicates the  
 84 predicted years. (b-d) Same as in (a), but for the zonal wind stress (Taux;  $10^{-2}$  Pa), meridional  
 85 wind stress (Tauy;  $10^{-3}$  Pa), and wind stress curl (Curl;  $10^{-8}$  Pa  $m^{-2}$ ) anomalies averaged in the  
 86 Southern Ocean (south of  $55^{\circ}$ S). Positive wind stress curl anomalies correspond to  
 87 downwelling anomalies in the ocean. (e-f) Same as in (a), but for the SAM (in hPa) and IPO  
 88 (in  $^{\circ}$ C) indices, respectively. (g) Same as in (b), but for the net surface heat flux anomalies (in  
 89  $W m^{-2}$ ). Positive surface heat flux anomalies indicate more heat going into the ocean.

90

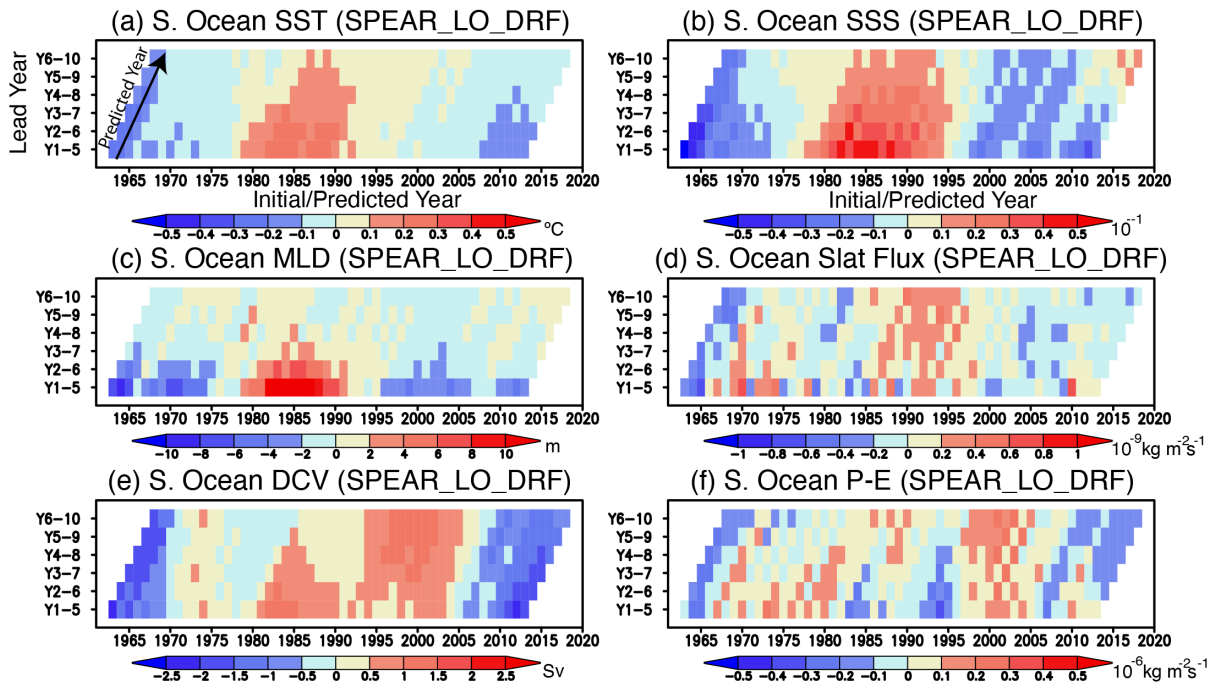

91

92 **Figure 11 (a)** Temporal evolution of ensemble mean Southern Ocean (south of 55°S) SST  
 93 anomalies predicted at lead times from 1-5 years to 6-10 years in the SPEAR\_LO\_DRF as a  
 94 function of initial/predicted years (x-axis) and lead years (y-axis). A black arrow indicates the  
 95 correlations with the same initial year for different lead times, while the corresponding x-axis  
 96 indicates the predicted years. **(b-f)** Same as in **(a)**, but for the SSS (in  $10^{-1}$  PSU), mixed-layer  
 97 depth (MLD; in m), salt flux (in  $10^{-9}$   $\text{kg m}^{-2} \text{s}^{-1}$ ), deep convection (DCV; in Sv), and  
 98 precipitation minus evaporation (P-E; in  $10^{-6}$   $\text{kg m}^{-2} \text{s}^{-1}$ ) anomalies averaged in the Southern  
 99 Ocean, respectively.

100



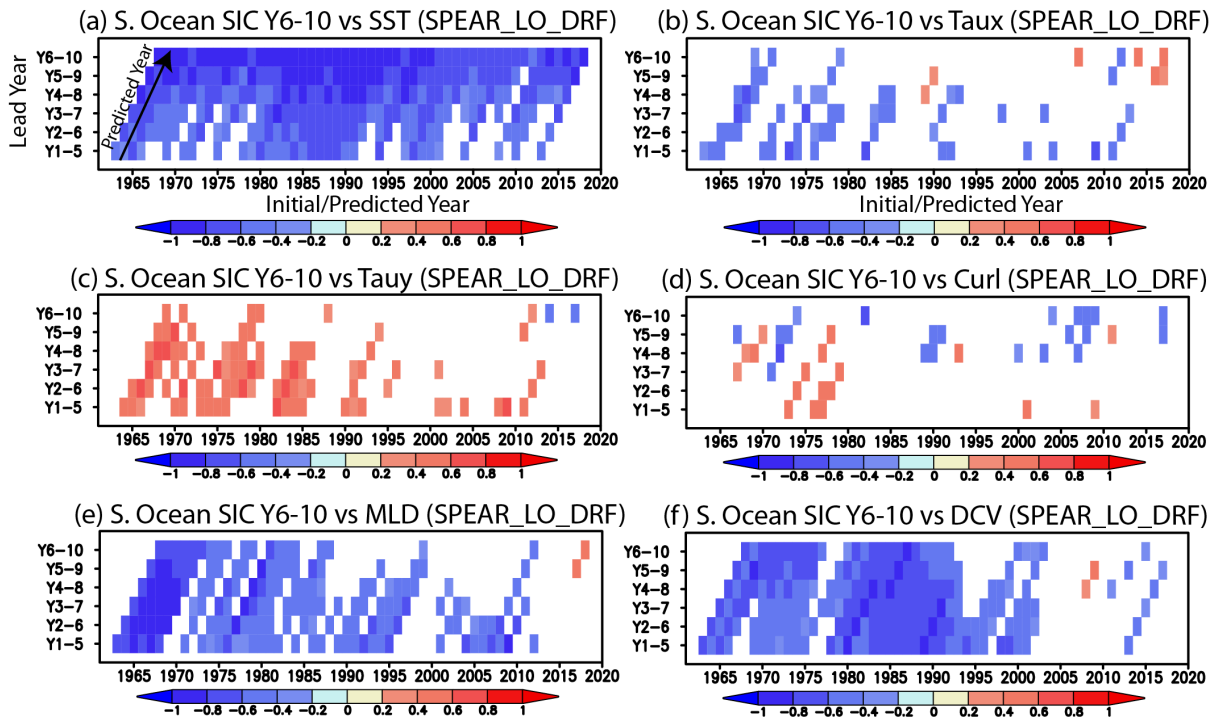

101

102

103

104

105

106

107

108

109

110

111

**Figure 12 (a)** Temporal evolution of inter-member correlation between the pan-Antarctic SIC anomalies predicted at a lead time of 6-10 years and the Southern Ocean SST anomalies predicted at lead times from 1-5 years to 6-10 years for the 20 ensemble members of the SPEAR\_LO\_DRF as a function of initial/predicted years (x-axis) and lead years (y-axis). A black arrow indicates the correlations with the same initial year for different lead times, while the corresponding x-axis indicates the predicted years. Correlation coefficients that are statistically significant at 90 % using Student's *t*-test are colored. **(b-f)** Same as in **(a)**, but for the inter-member correlation with the zonal wind stress, meridional wind stress, wind stress curl, mixed-layer depth, and deep convection anomalies averaged in the Southern Ocean.

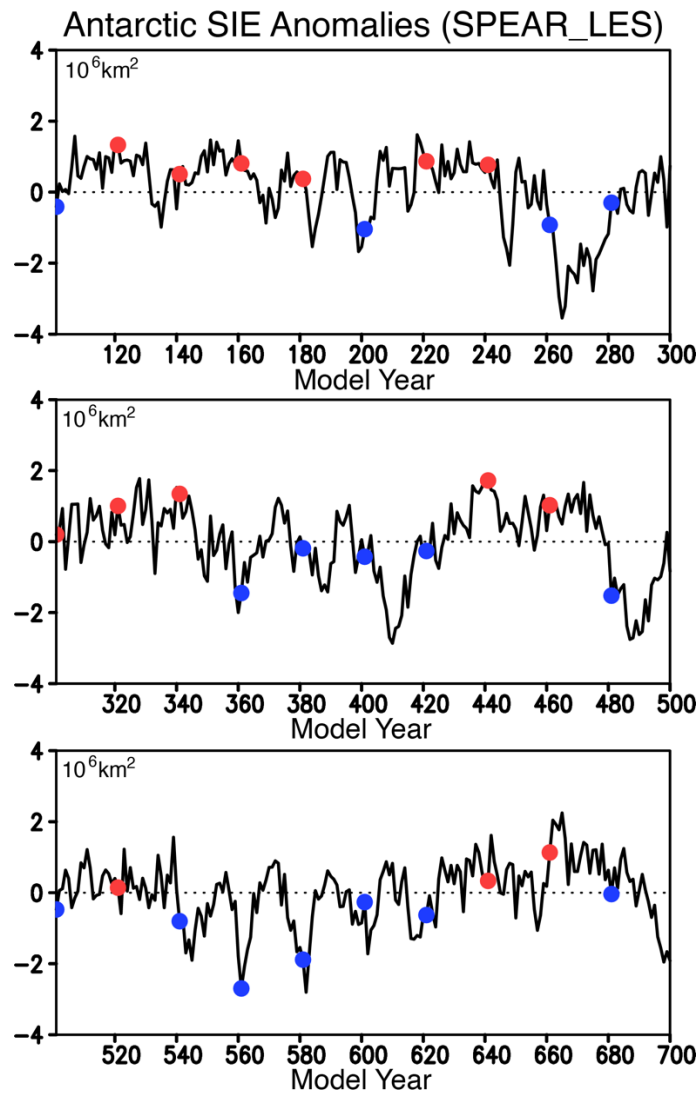

112

113 **Figure S1** Time series of Antarctic SIE anomalies (in  $10^6 \text{ km}^2$ ) from 101 to 700 years for the  
 114 SPEAR\_LES. Red and blue dots indicates the SPEAR\_LO\_DCIS start years (101, 121, ...,  
 115 681 with 20 years interval) with positive and negative SIE anomalies to generate large  
 116 ensemble members.

117

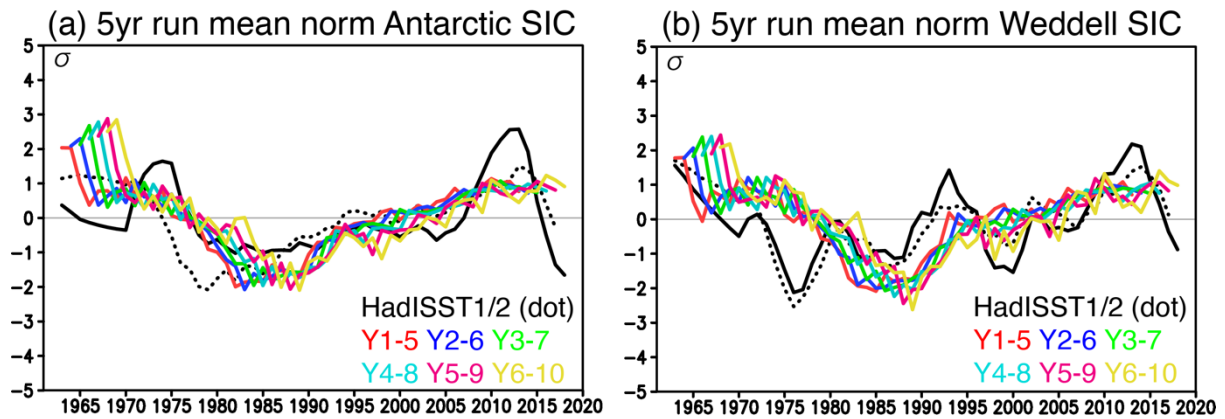

118

119 **Figure S8 (a)** Time series of 5-yr running mean pan-Antarctic SIC (in  $\sigma$ ) anomalies normalized  
 120 by standard deviation during 1961-2020. Black lines show the observed SIC anomalies from  
 121 HadISST1 (solid) and HadISST2 (dotted), whereas other colored lines correspond to the  
 122 ensemble mean normalized SIC anomalies predicted at lead times from 1-5 years to 6-10 years  
 123 in the SPEAR\_LO\_DRF. **(b)** Same as in **(a)**, but for the normalized SIC anomalies averaged  
 124 in the Weddell Sea.

125
